# Supplementary material for: The scale-up of microwave flow syntheses by recirculation: the chlorine-free preparation of alkyl phenyl-H-phosphinates
Source: Royal Society of Chemistry journal article supplement (doi:10.1039/d4re00527a), 2024-11-14

# Supporting Information

## The scale-up of microwave flow syntheses by recirculation; The chlorine-free preparation of alkyl phenyl-*H*-phosphinates

József Schindler, Dorka Nagy, Rebeka Harján and György Keglevich\*

*Department of Organic Chemistry and Technology, Faculty of Chemical Technology and*

*Biotechnology, Budapest University of Technology and Economics, 1111 Budapest,*

*Műegyetem rkp. 3. Hungary.*

*keglevich.gyorgy@vbk.bme.hu.*

## Table of Contents

|                                                     |   |
|-----------------------------------------------------|---|
| Spectra of the compounds 2a and 2e synthesized..... | 2 |
|-----------------------------------------------------|---|

## **Spectra of the compounds 2a and 2e synthesized**

$^{31}\text{P}$  { $^1\text{H}$ } NMR (202 MHz,  $\text{CDCl}_3$ )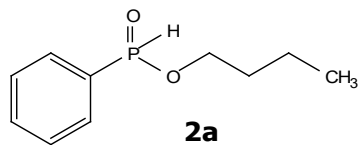

n-Butyl phenylphosphinate

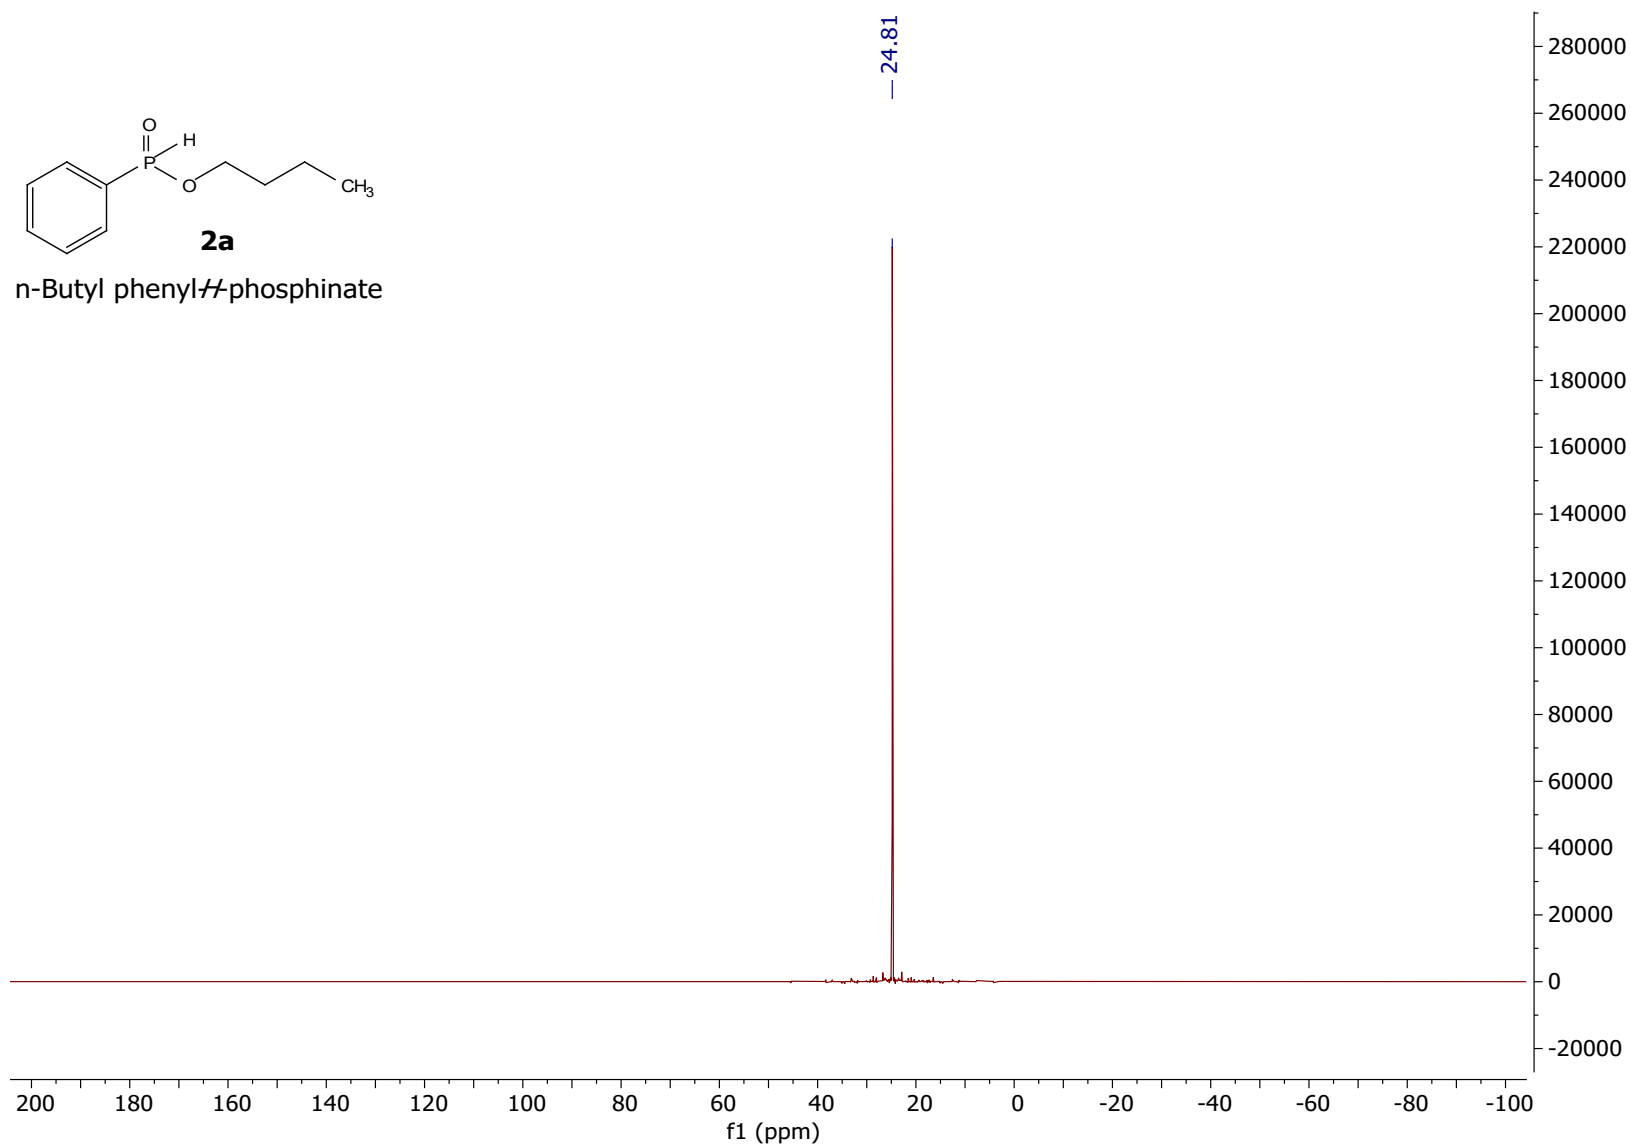

$^{13}\text{C}$   $\{^1\text{H}\}$  NMR (126 MHz,  $\text{CDCl}_3$ )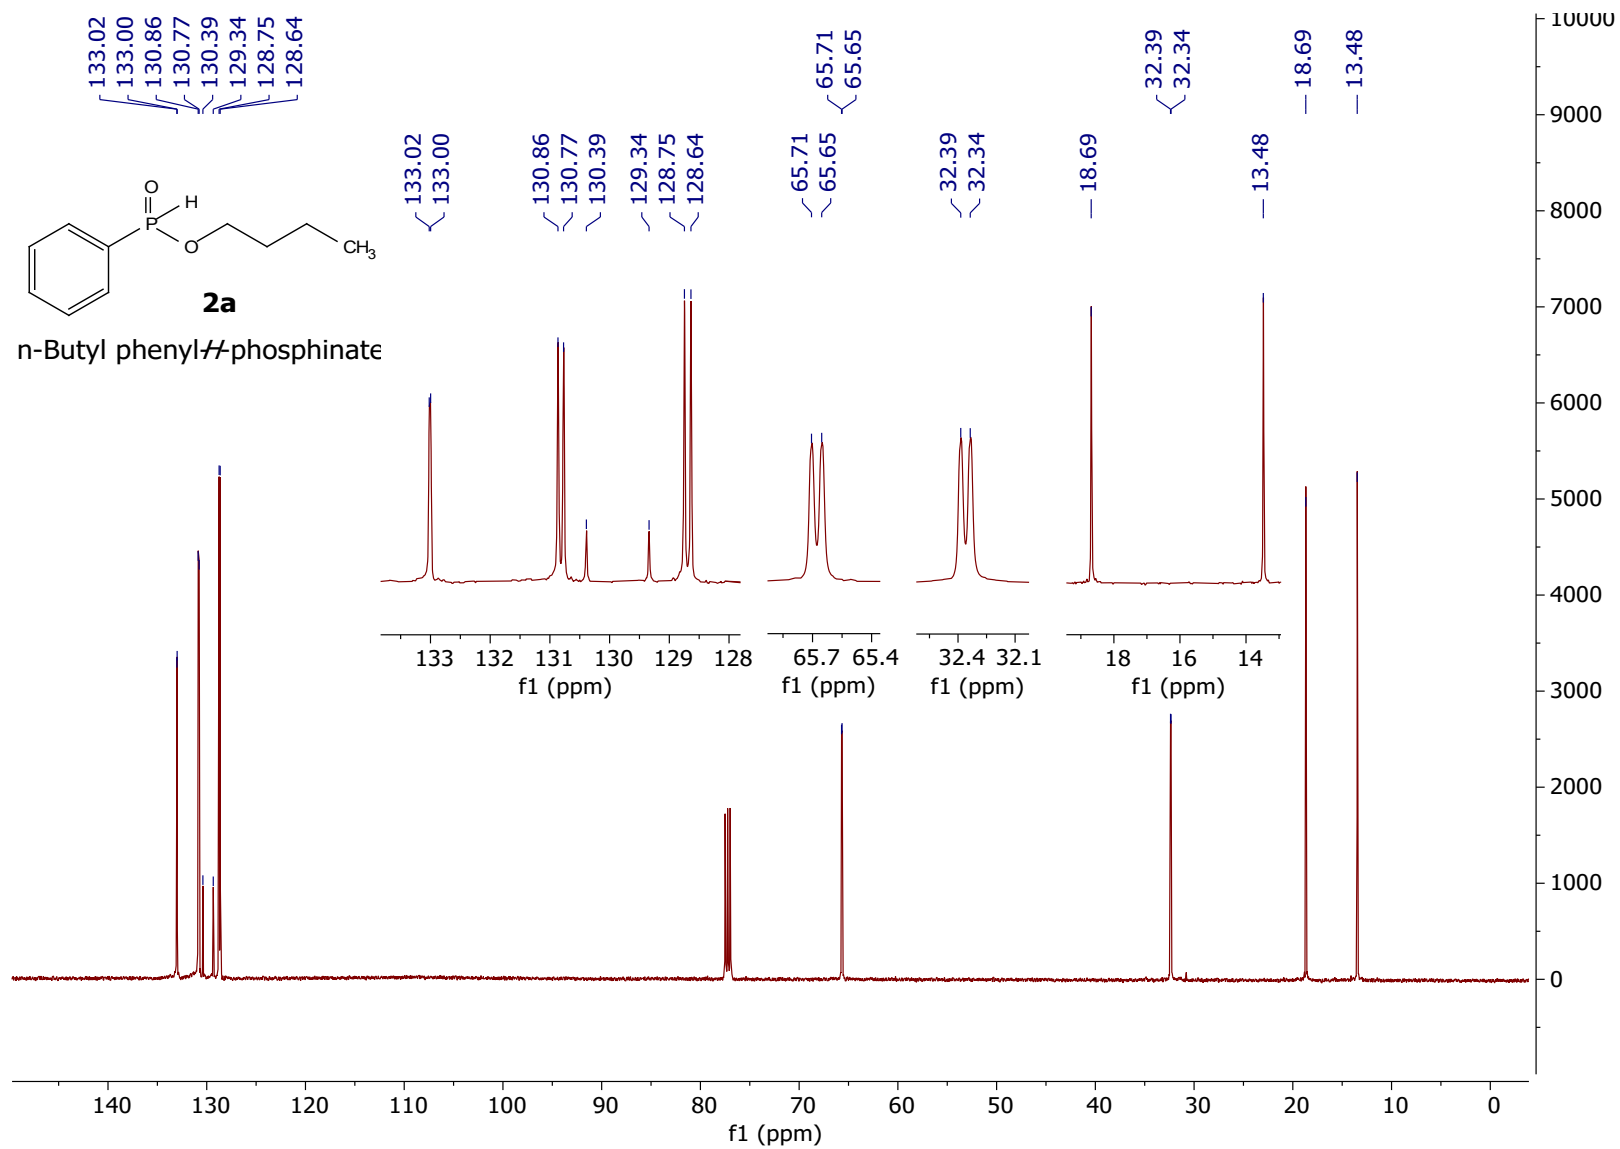

$^1\text{H}$  NMR (500 MHz,  $\text{CDCl}_3$ )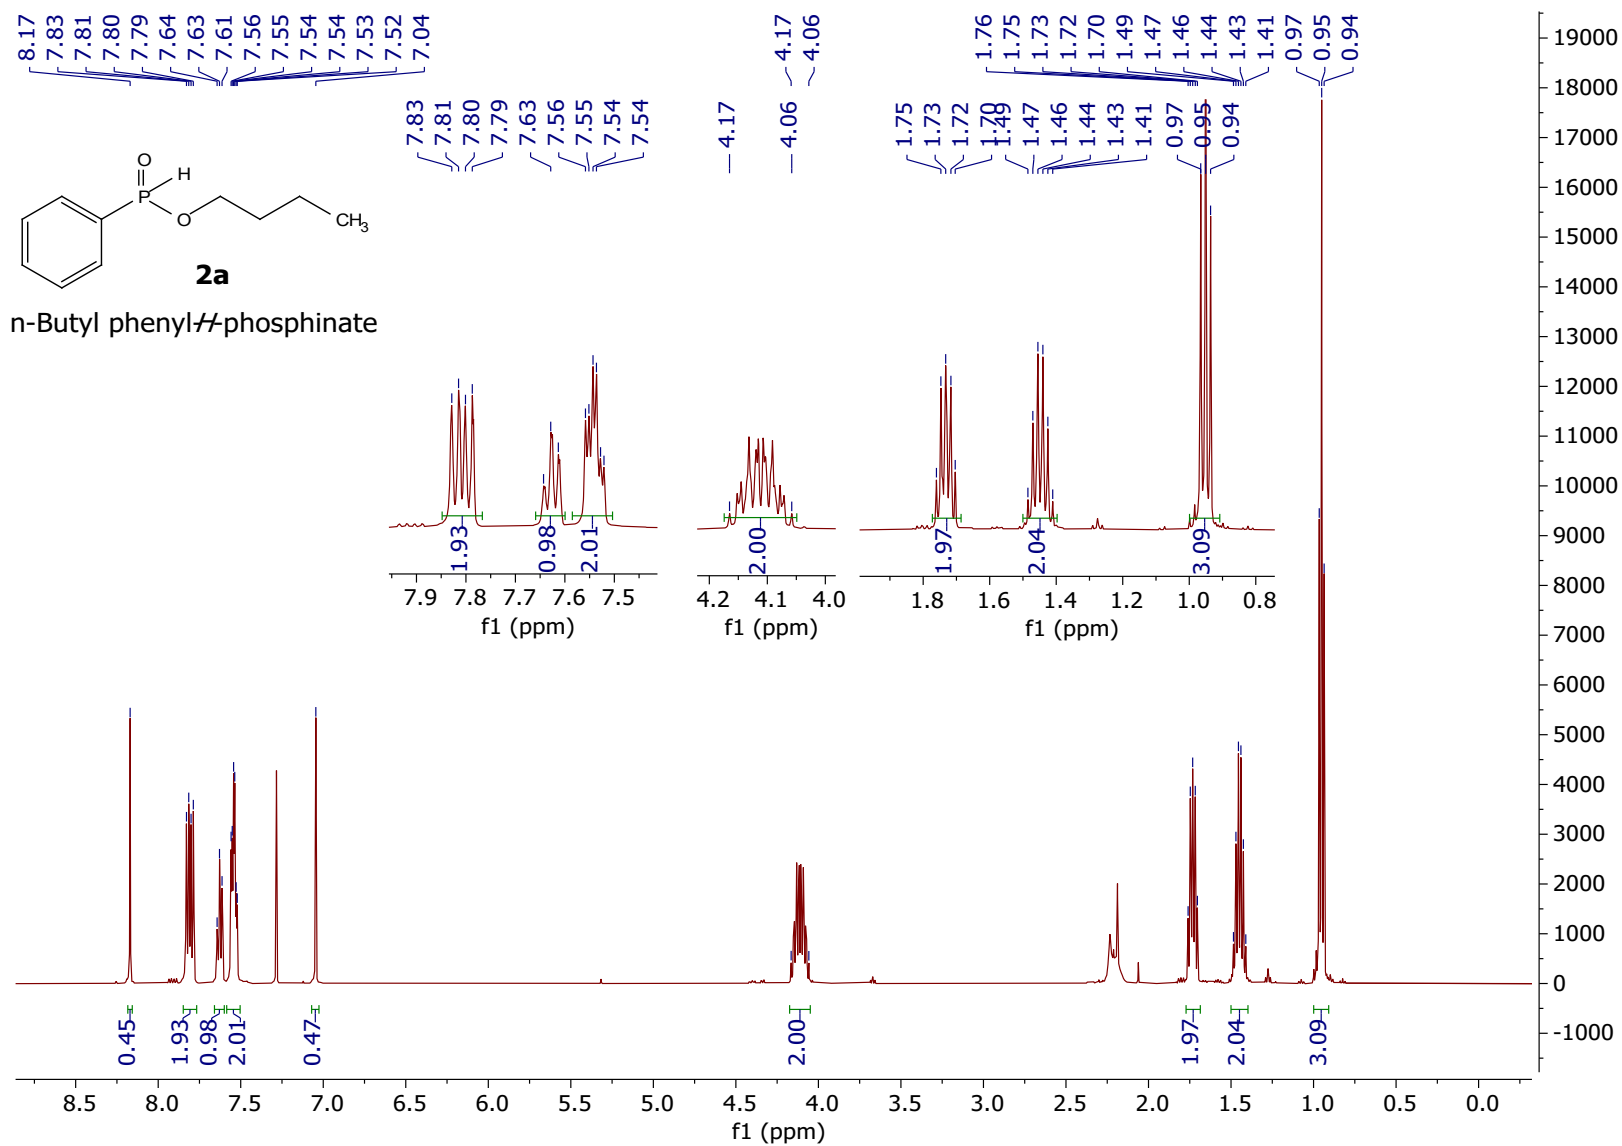

$^{31}\text{P}$   $\{^1\text{H}\}$  NMR (202 MHz,  $\text{CDCl}_3$ )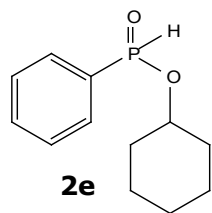

Cyclohexyl phenylphosphinate

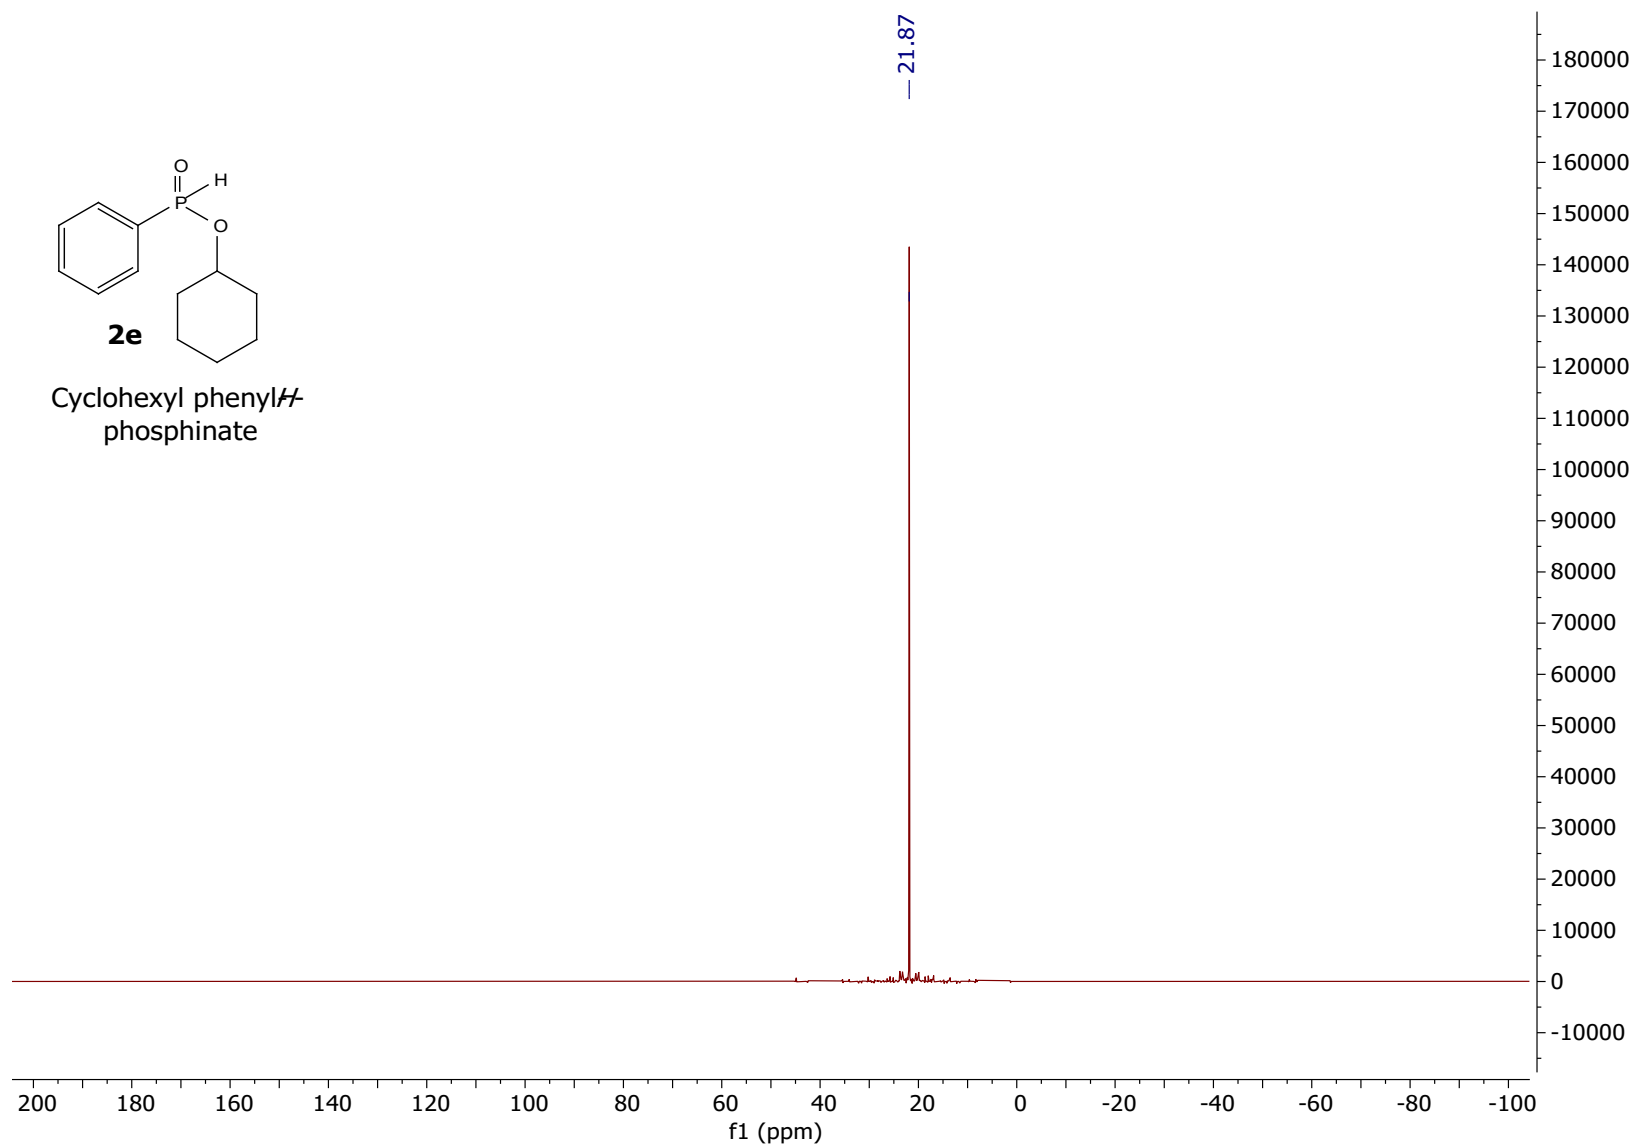

$^{13}\text{C}$   $\{^1\text{H}\}$  NMR (126 MHz,  $\text{CDCl}_3$ )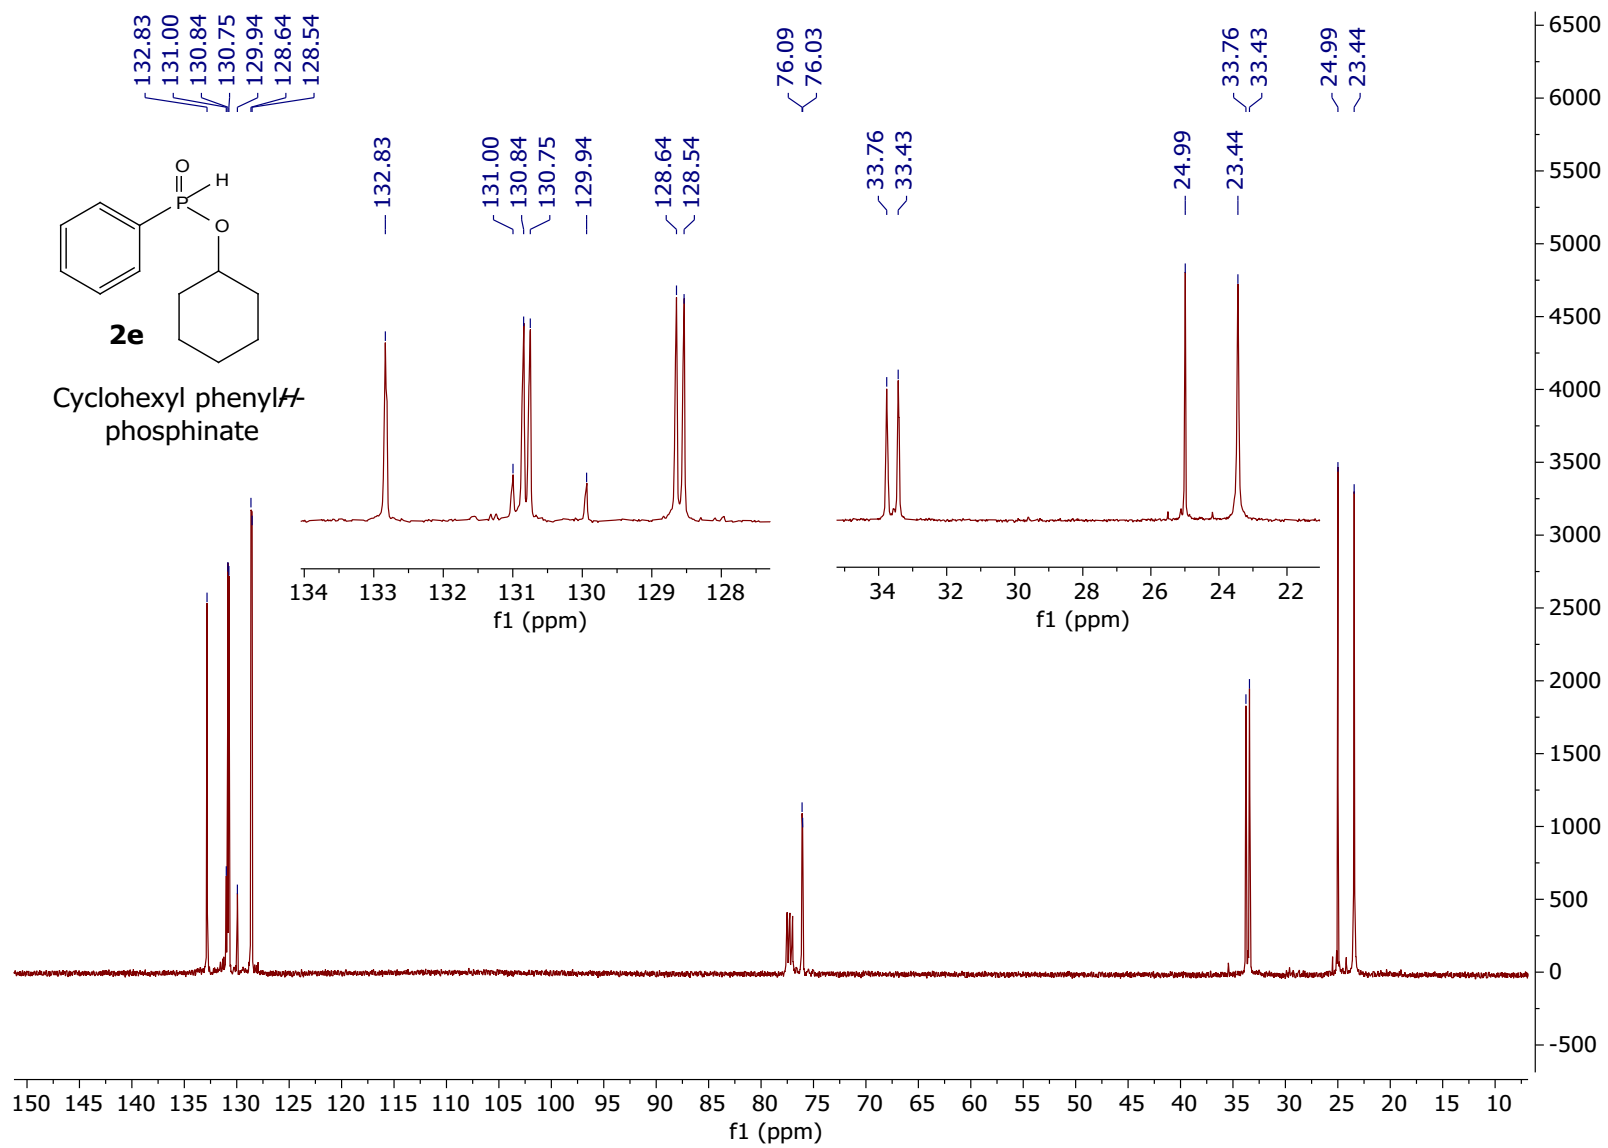

$^1\text{H}$  NMR (500 MHz,  $\text{CDCl}_3$ )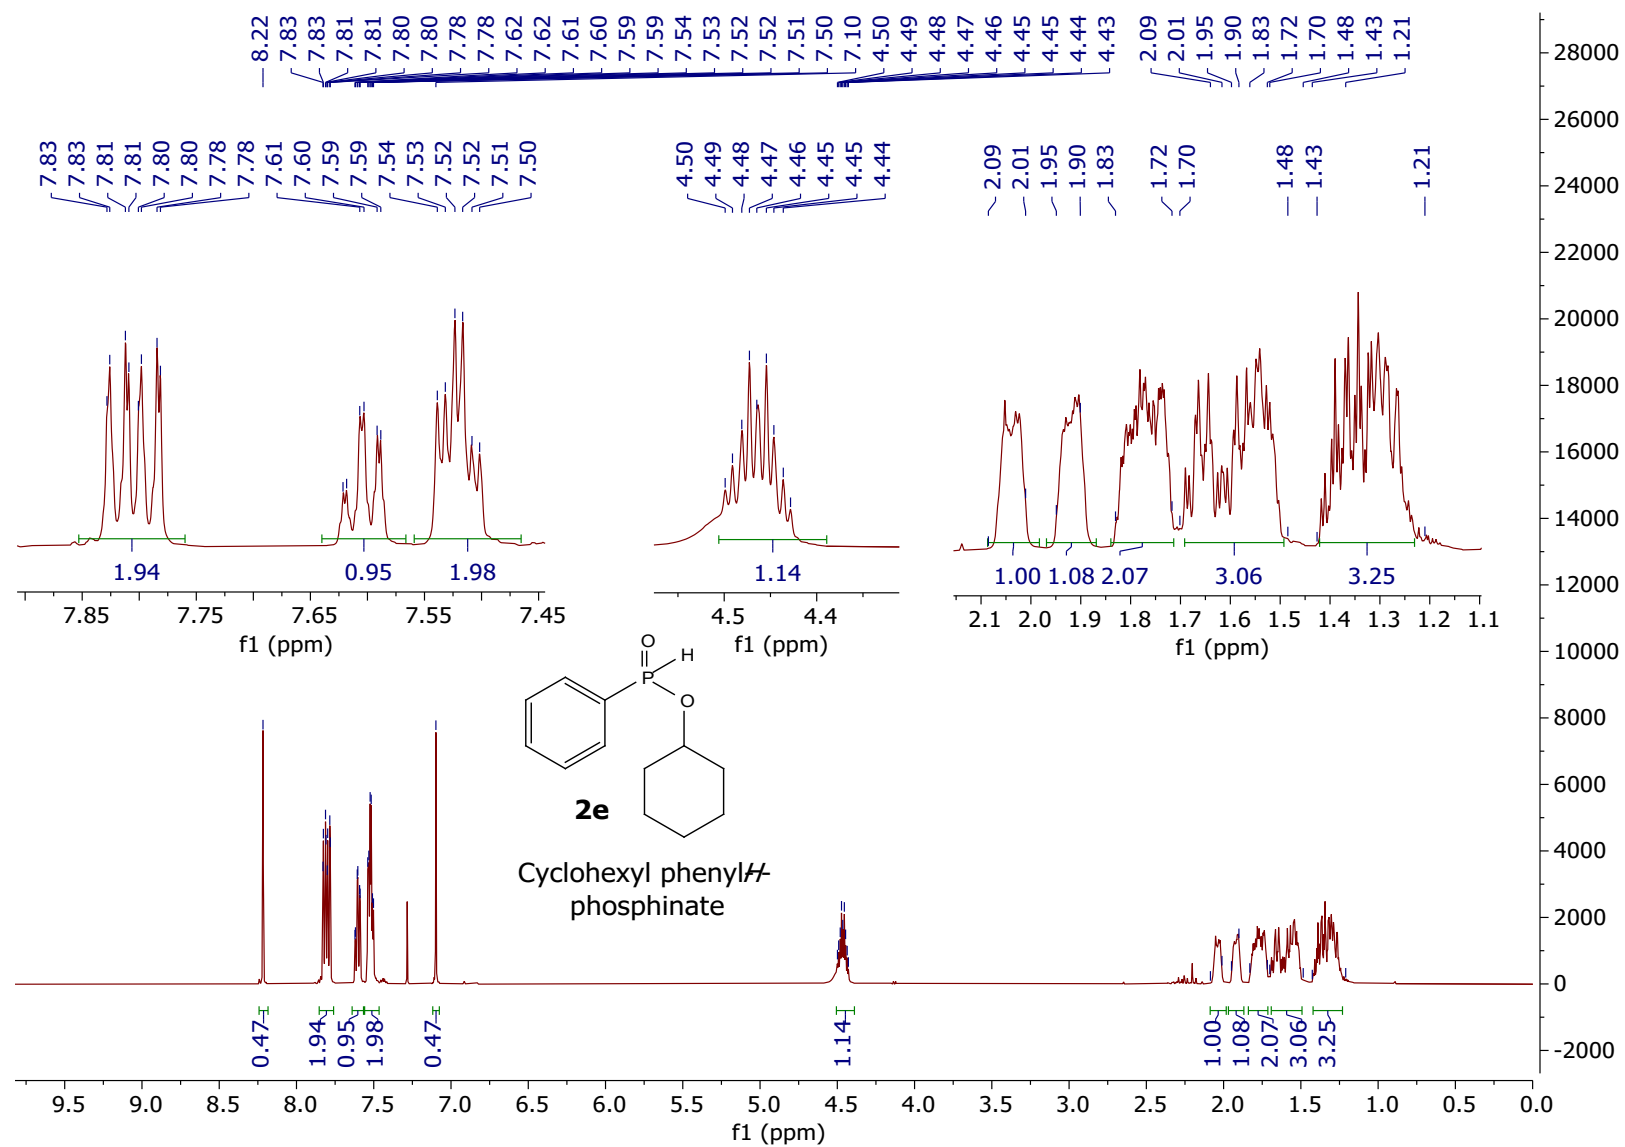

Supplement: d4re00527a1.pdf [file d4re00527a1.pdf]
